1 **GFAP: ultra-fast and accurate gene functional annotation software for plants**

2 Dong Xu<sup>1</sup>, Kangming Jin<sup>3</sup>, Heling Jiang<sup>1</sup>, Desheng Gong<sup>1</sup>, Jinbao Yang<sup>1</sup>, Wenjuan Yu<sup>1</sup>,  
3 Yingxue Yang<sup>1\*</sup>, Jihong Li<sup>2\*</sup>, Weihua Pan<sup>1\*</sup>

4 <sup>1</sup>Shenzhen Branch, Guangdong Laboratory of Lingnan Modern Agriculture, Genome  
5 Analysis Laboratory of the Ministry of Agriculture and Rural Affairs, Agricultural  
6 Genomics Institute at Shenzhen, Chinese Academy of Agricultural Sciences, Shenzhen  
7 518120, China

8 <sup>2</sup>College of Forestry, Shandong Agricultural University, Tai'an, Shandong 271018,  
9 China

10 <sup>3</sup>State Key Laboratory of Tree Genetics and Breeding, Chinese Academy of Forestry,  
11 Beijing 100091, China

12

13 Author for correspondence:

14 Weihua Pan

15 Tel: +86 13775040671

16 Email: [panweihua@caas.cn](mailto:panweihua@caas.cn)

17

18

19

20

21

22

23

24

25

26

27

28

29

30

31 **Abstract**

32       Sequence alignment is the basis of gene functional annotation for unknow  
33 sequences. Selecting closely related species as the reference species should be an  
34 effective way to improve the accuracy of gene annotation for plants, compared with  
35 only based on one or some model plants. Therefore, limited species number in previous  
36 software or website is disadvantageous for plant gene annotation.

37       Here, we collected the protein sequences of 236 plant species with known genomic  
38 information from 63 families. After that, these sequences were annotated by pfam, Gene  
39 Ontology (GO) and Kyoto Encyclopedia of Genes and Genomes (KEGG) databases to  
40 construct our databases. Furthermore, we developed the software, **Gene Annotation**  
41 **Software for Plants (GFAP)**, to perform gene annotation using our databases. GFAP, an  
42 open-source software running on Windows and MacOS systems, is an efficient and  
43 network independent tool. GFAP can search the protein domain, GO and KEGG  
44 information for 43000 genes within 4 minutes. In addition, GFAP can also perform the  
45 sequence alignment, statistical analysis and drawing. The website of  
46 <https://gitee.com/simon198912167815/gfap-database> provides the software, databases,  
47 testing data and video tutorials for users.

48       GFAP contained large amount of plant-species information. We believe that it will  
49 become a powerful tool in gene annotation using closely related species for phytologists.

50 **Key words:** Gene functional annotation for plants, GO database, KEGG database,  
51 sequence alignment, statistical analysis.

52

53

54

55

56

57

58

59

60

61

## 62 **Introduction**

63 Gene functional annotation (GFA) is an important part for bioinformatic analysis,  
64 such as genomics (Cheng et al., 2021), transcriptome (Fernandez-Valverde et al., 2015)  
65 and gene family analysis (Martin et al., 2010). Furthermore, GFA can also provide vital  
66 guidance for wet-lab biologists to explain the life phenomenon (Wei et al., 2017).  
67 Therefore, GFA plays important roles in almost every aspect of plant studies.

68 However, annotation errors were continuously reported in various studies (Jones  
69 et al., 2007; Bayer et al., 2018). The absence of befitting species models is an essential  
70 factor for these annotation errors (Kim et al., 2020). For example, *Arabidopsis thaliana*,  
71 a common model plant in many GFA websites, has significant differences in xylem  
72 development of woody plants (Jiao et al., 2012; Bu et al., 2021). Selecting *Arabidopsis*  
73 *thaliana* as the reference species to annotate the xylem developmental genes of woody  
74 plants may result in annotation errors. To date, although more and more plant genomes  
75 have been sequenced, available plant models for gene annotation were still scarce. For  
76 example, only two species were plants (*Arabidopsis* and rice) among the 15 species  
77 collected in GeneCodis (Nogales-Cadenas et al., 2009). The similar phenomenon can  
78 also be found in other websites (Medina et al., 2010; Kuleshov et al., 2016). Large  
79 amount of unknow genes were discovered and remained to be annotated, with the  
80 development of high-throughput sequencing technology. Therefore, it is higher  
81 requirements in annotation efficiency of gene annotation software. In other word, an  
82 ideal annotation tools should not only contain large amount of plant models but also  
83 have a high efficiency in gene annotation.

84 To solve the problems of plant-model absence, the genes of total 200 plant species  
85 from 60 families were annotated by the database of the protein families database (pfam),  
86 Gene Ontology (GO) and Kyoto Encyclopedia of Genes and Genomes (KEGG)  
87 (Kanehisa and Goto, 2000; Consortium, 2004; Finn et al., 2014). The annotated results  
88 were added into our databases. To improve annotation efficiency, we optimized our  
89 databases structures and developed a novel software, **Gene Annotation Software for**  
90 **Plants (GFAP)**, for calling relevant information from our databases to complete the

91 annotation process. For example, in testing phase, 43000 genes can be annotated by  
92 their protein domains within 56 seconds (Video S1). Furthermore, there was no limit of  
93 GFAP in the size of input files, which can be essential for dealing with big biological  
94 data. Therefore, we believe that GFAP could be a useful tool for phytologists to solve  
95 the problems in GFA of plants.

## 96 **Results**

### 97 **Database information**

98 The basic information of our databases was listed in the Table S1. Total 125 species  
99 were concluded into our databases, ranging from algae, mosses, gymnosperms to  
100 monocots and dicotyledon. Among of them, the data of 51 species from 51 families  
101 were added into GFAP. Other data can be freely downloaded from the website of  
102 <https://gitee.com/simon198912167815/gafp-database>, and can be utilized by GFAP  
103 when added into the indicated folders. Figure 1 showed the database-construction  
104 process and the roles of databases (including DNA/protein-sequences, protein-domain,  
105 GO and KEGG databases) in using GFAP.

### 106 **Overview of the functions and workflow of GFAP**

107 Four modules were constructed in GFAP (Figure 2a). The Alignment module was  
108 responsible for sequence alignment. Users can align their sequences to a selected  
109 database. For example, if obtaining some sequences from Crassulaceae plants, the users  
110 can select *Kalanchoe fedtschenkoi* (a Crassulaceae plant in database) for alignment.  
111 The alignment process was completed by the diamond software (Hernández-Salmerón  
112 and Moreno-Hagelsieb, 2020) to increase the alignment efficiency. Here, we strongly  
113 encouraged users to utilize the protein sequences for alignment. However, considering  
114 that some users may not have the protein sequences, GFAP still supported the DNA  
115 alignment, and users need to download the relevant DNA databases from our website.  
116 After that, users can flexibly choose the types of functional annotation (Figure 2b). The  
117 protein domains can be detected using the superHMM module (Figure 2a), and the  
118 results can help users predict gene functions or identify the members of their interested  
119 gene families. The annotation results of GO and KEGG databases can be obtained from  
120 the GO analysis and KEGG analysis module, respectively. Furthermore, the processes

121 of statistical analysis and drawing can also be completed by the relevant functions of  
122 GFAP (Figure 2a).

### 123 **The characters of GFAP**

124 Compared with previous websites or software (Table S2), GFAP has the following  
125 characteristics:

126 (1) GFAP was specially designed for gene annotation of plants. Our databases contained  
127 the annotated information of over 200 plant species, which can allow users freely select  
128 the closely related species to annotate their interested genes.

129 (2) Highly efficient gene annotation. The optimized data structure and efficient  
130 extracted tools can annotate thousands of genes within several seconds or minutes  
131 (Video S1, in Windows 10, the random access memory was 8 GB).

132 (3) More comprehensive annotation information. The GFAP databases contained the  
133 information of all protein domains of genes. Therefore, the annotation results of GFAP  
134 can provide more information for users, which can help phytologists better understand  
135 their interested genes. For example, The domains related with phosphatase and  
136 nucleotidase can be simultaneously detected in the sequences of Bradi2g62150.2.p  
137 (Table 1), indicating that Bradi2g62150.2.p may act in the process relevant with  
138 phosphatase and nucleotidase.

139 (4) Systematic analysis. In addition to the functional annotation, statistical analysis and  
140 drawing can also be performed using GFAP Windows version. For example, users can  
141 make GO clustering analysis utilizing the “GO analysis” module (Figure 3 a). The  
142 heatmap and network can also be drawn by the “KEGG analysis” (Figure 3b and c).  
143 Furthermore, the format of GFAP-output files can meet with the requirements of other  
144 websites or software, such as REVIGO (<http://revigo.irb.hr/>) and clusterProfiler (Yu et  
145 al., 2012)..

146 (5) Fewer limits in using GFAP. The functions of GFAP can be completed by point-  
147 and-click icons instead of inputting any command lines. The prompt information on the  
148 GFAP surface (Figure 3d) can help users run the GFAP without any barriers. GFAP can  
149 perform its functions independent with internet. Furthermore, there were not limits of  
150 GFAP to the input-file size. For example, the protein-domain annotation for a 91.1 Mb

151 protein-sequence file can be completed within three minutes (Video S2).

### 152 **The accuracy of GFAP**

153 The accuracy of GFA is an important issue for users. Two aspects of comparisons were  
154 made to demonstrate the GFAP accuracy. The comparison of annotated results should  
155 be made among different databases of GFAP firstly, as there should be some similarities  
156 in annotation results among different databases (even though they described different  
157 aspects of a gene). The protein-sequence file of *Brachypodium distachyon* was  
158 downloaded from the phytozome website, and we randomly selected 500 genes for  
159 annotation. As *B. distachyon* is in *Gramineae* family, we chose *Oryza sativa* as the  
160 reference species. The results were listed in Table S3, and the similar results of the three  
161 databases were marked by red color. Figure 4 showed the statistical result. Total 372,  
162 347 and 410 genes were annotated by the protein-domain, KEGG and GO databases,  
163 respectively. Among of them, the annotations of 414 genes obtained from at least two  
164 databases were similar with each other. The functions of 44 genes remained to be  
165 unknown. These results indicated that the annotation results of GFAP had high accuracy,  
166 as a large amount of genes were annotated by similar information from different  
167 databases.

168 Secondly, we compared the annotation results of GFAP with the functions demonstrated  
169 by wet-lab biologists (Table 2). We randomly selected ten genes in poplars, and chose  
170 *Populus deltoides* as the reference species for gene annotation. The annotated results  
171 were listed in Table S4, and the partial results were showed in Table 2. We found that  
172 the annotation results were highly consistent with the published functions. For example,  
173 the *NatA* was a N-terminal acetyltransferase (Zhu et al., 2014). The acetyltransferase  
174 domain was detected in the “superHMM” module of GFAP. Similarly, the N-  
175 acetyltransferase activity was found using the functions of GO annotation. While, the  
176 sequence was directly defined as the N-acetyltransferase by KEGG annotation. In  
177 summary, based on the above results, we believed that the annotation results of GFAP  
178 were highly accurate.

179 **Table 2** Comparison of the annotated information by GFAP with the published functions of genes

| Gene ID          | Publication information    | Functions in articles                       | Protein-domain (GFAP)             | GO annotation (GFAP)                      | KEGG annotation (GFAP)                        |
|------------------|----------------------------|---------------------------------------------|-----------------------------------|-------------------------------------------|-----------------------------------------------|
| <i>LysoPL2</i>   | (Jiang et al., 2021)       | Lysophospholipase                           | Phospholipase/carboxylesterase    | Lysophospholipase activity                | Lysophospholipase                             |
| <i>Nata</i>      | (Zhu et al., 2014)         | N-terminal acetyltransferase                | Acetyltransferase domain          | N-acetyltransferase activity              | N-acetyltransferase                           |
| <i>PdERECTA</i>  | (Xing et al., 2011)        | Leucine-rich repeat<br>receptor-like kinase | Leucine rich repeat kinase domain | Protein kinase activity                   | Leucine-rich repeat domain-containing protein |
| <i>Pop14A9</i>   | (Lafarguette et al., 2004) | Fasciclin-like<br>arabinogalactan           | Fasciclin domain                  | Plant-type secondary cell wall biogenesis | Fasciclin 1                                   |
| <i>PtHMA4</i>    | (Adams et al., 2011)       | Heavy metal regulation                      | Heavy-metal-associated domain     | Metal ion transport                       | Cd <sup>2+</sup> -exporting ATPase            |
| <i>PtaZFP2</i>   | (Martin et al., 2014)      | Zinc finger protein                         | C2H2-type zinc finger             | Response to wounding                      | Zinc finger protein                           |
| <i>PtC3H17</i>   | (Chai et al., 2014)        | CCCH zinc finger protein                    | Zinc finger C-x8-C-x5-C-x3-H type | Metal ion binding                         | RING /CCCH-type zinc finger protein           |
| <i>PttAMT1.2</i> | (Selle et al., 2005)       | Ammonium importer                           | Ammonium transporter family       | Ammonium transport                        | Ammonium transporter, Amt family              |
| <i>PttSLAH3</i>  | (Jaborsky et al., 2016)    | Anion channel                               | Voltage-dependent anion channel   | Anion channel activity                    | Tellurite resistance protein                  |
| <i>Ptxerico</i>  | (Kim et al., 2020)         | RING-H2 Zinc Finger                         | RING-H2 zinc finger domain        | Zinc ion/ protein binding                 | Zinc finger -like/RING finger protein         |

## 181 **Discussion**

182 GFA plays important roles in many aspects of plant studies. For example, GFA can help  
183 wet-lab phytologists explain the developmental process of plants (Wei et al., 2017).  
184 GFA is the basis for gene family analysis (Xiao et al., 2018). In addition, it is also an  
185 important part for genomics and transcriptomics (Bengtsson et al., 2014; Chen et al.,  
186 2021). Therefore, the results of GFA will profoundly influence the development of plant  
187 science. Compared with previous websites (Huang et al., 2009; Zhou et al., 2019), we  
188 constructed GFA databases for 124 plant species, and developed GASF software to  
189 efficiently annotate the unknown-function genes. Over 52 families of plants were  
190 concluded into our databases. We believed that GASF can annotate most plant species  
191 lacking of genomic information with the information of closely related species.

192 Sequence alignment is the basis for GFA (Xiao et al., 2018). For this reason, the results  
193 of GFA are highly affected by the similarities between sequences in databases and the  
194 function-unknown sequences. This may also be an important cause of GFA deviation. In  
195 this study, we found that compared with choosing closely related species, 30-40 genes  
196 from *B. distachyon* were not annotated when selecting *A. thaliana* as the reference  
197 species (Figure 4). This result further highlights the importance of selecting closely  
198 related species for GFA, as high sequence similarities can be found between closely  
199 related species. Meanwhile, in GASF, the diamond program was chosen for sequence  
200 alignment. The accuracy of diamond is higher than that of the traditional blast program  
201 (Hernández-Salmerón and Moreno-Hagelsieb, 2020). The above factors guaranteed the  
202 accuracy of the GASF annotation results.

## 203 **Materials and Methods**

204 In this study, the protein and DNA sequences were downloaded from the website of  
205 phytozome (<https://phytozome-next.jgi.doe.gov/>), TPIA  
206 (<http://tpia.teaplant.org/index.html>), eplant (<http://eplant.njau.edu.cn/>),  
207 EnsemblPlants (<http://plants.ensembl.org/info/data/ftp/index.html>) and NCBI  
208 (<ftp://ftp.ncbi.nlm.nih.gov/genomes/refseq/plant>). After that, the longest transcript of  
209 each gene was remained using the functions of SPDE (Xu et al., 2021).

## 210 **Protein-domain database**



211 The database of Pfam-A (Finn et al., 2013) was used for identification of protein  
212 domains in batch, with the help of hmmpress and hmmscan programs (Malhotra and  
213 Sowdhamini, 2013). To accelerate the speed of annotations and reduce the size of the  
214 database, the gene ID and its protein-domain name were remained, and other  
215 information was removed from the annotation results.

#### 216 **KEGG database**

217 KEGG database was built by KofamKOALA (Aramaki et al., 2019) using protein  
218 sequences. As stated above, only gene ID and the relevant KEGG ID were remained.

#### 219 **GO database**

220 After obtaining the Pfam ID for each gene, the database of Pfam2GO  
221 (<https://rdrr.io/github/missuse/ragp/man/pfam2go.html>) was used to identify the GO ID  
222 for genes (Mitchell et al., 2015). Furthermore, the software of blast2go (Conesa et al.,  
223 2005) was also utilized for confirming these results.

#### 224 **The development of GFAP**

225 GFAP was developed by python language using 3.8 version.

#### 226 **Conclusion**

227 GFAP is a highly efficient and accurate tool for gene functional annotation. Its accuracy  
228 indicated that it can play important roles in predicting the gene functions for wet-lab  
229 phytologists. Moreover, the high efficiency and accuracy revealed that it can be used  
230 for functional genomics and transcriptome analysis. At the same time, lots of plant-  
231 species information can be available for related species annotation, and this process  
232 provided a new annotated method for species with unknow genomic information.

#### 233 **Acknowledgements**

234 This study was supported by the Zhejiang Science and Technology Major Program on  
235 Agricultural New Variety Breeding (2021C02070-1), the National Natural Science  
236 Foundation of China (31872168).

#### 237 **Reference**

- 238 Adams JP, Adeli A, Hsu C-Y, Harkess RL, Page GP, dePamphilis CW, Schultz EB, Yuceer C  
239 (2011) Poplar maintains zinc homeostasis with heavy metal genes HMA4 and PCS1.  
240 Journal of Experimental Botany **62**: 3737-3752  
241 Aramaki T, Blanc-Mathieu R, Endo H, Ohkubo K, Kanehisa M, Goto S, Ogata H (2019)

- 242 KofamKOALA: KEGG Ortholog assignment based on profile HMM and adaptive score  
243 threshold. *Bioinformatics* **36**: 2251-2252
- 244 **Bayer PE, Edwards D, Batley J** (2018) Bias in resistance gene prediction due to repeat masking.  
245 *Nature Plants* **4**: 762-765
- 246 **Bengtsson T, Weighill D, Proux-Wéra E, Levander F, Resjö S, Burra DD, Moushib LI, Hedley  
247 PE, Liljeroth E, Jacobson D, Alexandersson E, Andreasson E** (2014) Proteomics and  
248 transcriptomics of the BABA-induced resistance response in potato using a novel  
249 functional annotation approach. *BMC Genomics* **15**: 315
- 250 **Bu D, Luo H, Huo P, Wang Z, Zhang S, He Z, Wu Y, Zhao L, Liu J, Guo J, Fang S, Cao W, Yi L,  
251 Zhao Y, Kong L** (2021) KOBAS-i: intelligent prioritization and exploratory visualization of  
252 biological functions for gene enrichment analysis. *Nucleic Acids Research* **49**: W317-  
253 W325
- 254 **Chai G, Qi G, Cao Y, Wang Z, Yu L, Tang X, Yu Y, Wang D, Kong Y, Zhou G** (2014) Poplar  
255 PdC3H17 and PdC3H18 are direct targets of PdMYB3 and PdMYB21, and positively  
256 regulate secondary wall formation in Arabidopsis and poplar. *New Phytologist* **203**:  
257 520-534
- 258 **Chen F, Su L, Hu S, Xue J-Y, Liu H, Liu G, Jiang Y, Du J, Qiao Y, Fan Y** (2021) A chromosome-  
259 level genome assembly of rugged rose (*Rosa rugosa*) provides insights into its evolution,  
260 ecology, and floral characteristics. *Horticulture Research* **8**: 1-13
- 261 **Cheng J, Wang X, Liu X, Zhu X, Li Z, Chu H, Wang Q, Lou Q, Cai B, Yang Y, Lu X, Peng K, Liu  
262 D, Liu Y, Lu L, Liu H, Yang T, Ge Q, Shi C, Liu G, Dong Z, Xu X, Wang W, Jiang H, Ma  
263 Y** (2021) Chromosome-level genome of Himalayan yew provides insights into the origin  
264 and evolution of the paclitaxel biosynthetic pathway. *Molecular Plant* **14**: 1199-1209
- 265 **Conesa A, Gotz S, Garcia-Gomez JM, Terol J, Talon M, Robles M** (2005) Blast2GO: a universal  
266 tool for annotation, visualization and analysis in functional genomics research.  
267 *Bioinformatics* **21**: 3674-3676
- 268 **Consortium GO** (2004) The Gene Ontology (GO) database and informatics resource. *Nucleic  
269 Acids Research* **32**: D258-D261
- 270 **Fernandez-Valverde SL, Calcino AD, Degnan BM** (2015) Deep developmental transcriptome  
271 sequencing uncovers numerous new genes and enhances gene annotation in the  
272 sponge *Amphimedon queenslandica*. *BMC Genomics* **16**: 387
- 273 **Finn RD, Bateman A, Clements J, Coggill P, Eberhardt RY, Eddy SR, Heger A, Hetherington  
274 K, Holm L, Mistry J, Sonnhammer ELL, Tate J, Punta M** (2013) Pfam: the protein  
275 families database. *Nucleic Acids Research* **42**: D222-D230
- 276 **Finn RD, Bateman A, Clements J, Coggill P, Eberhardt RY, Eddy SR, Heger A, Hetherington  
277 K, Holm L, Mistry J, Sonnhammer ELL, Tate J, Punta M** (2014) Pfam: the protein  
278 families database. *Nucleic Acids Research* **42**: D222-D230
- 279 **Hernández-Salmerón JE, Moreno-Hagelsieb G** (2020) Progress in quickly finding orthologs as  
280 reciprocal best hits: comparing blast, last, diamond and MMseqs2. *BMC Genomics* **21**:  
281 741
- 282 **Huang DW, Sherman BT, Lempicki RA** (2009) Systematic and integrative analysis of large gene  
283 lists using DAVID bioinformatics resources. *Nature Protocols* **4**: 44-57
- 284 **Jaborsky M, Maierhofer T, Olbrich A, Escalante-Pérez M, Müller HM, Simon J, Krol E, Cuin  
285 TA, Fromm J, Ache P, Geiger D, Hedrich R** (2016) SLAH3-type anion channel

- 286 expressed in poplar secretory epithelia operates in calcium kinase CPK-autonomous  
287 manner. *New Phytologist* **210**: 922-933
- 288 **Jiang X, Xu L, Gao Y, He M, Bu Q, Meng W** (2021) Phylogeny and subcellular localization  
289 analyses reveal distinctions in monocot and eudicot class IV acyl-CoA-binding proteins.  
290 *Planta* **254**: 71
- 291 **Jiao X, Sherman BT, Huang DW, Stephens R, Baseler MW, Lane HC, Lempicki RA** (2012)  
292 DAVID-WS: a stateful web service to facilitate gene/protein list analysis. *Bioinformatics*  
293 **28**: 1805-1806
- 294 **Jones CE, Brown AL, Baumann U** (2007) Estimating the annotation error rate of curated GO  
295 database sequence annotations. *BMC Bioinformatics* **8**: 170
- 296 **Kanehisa M, Goto S** (2000) KEGG: Kyoto Encyclopedia of Genes and Genomes. *Nucleic Acids*  
297 *Research* **28**: 27-30
- 298 **Kim M-H, Cho J-S, Park E-J, Lee H, Choi Y-I, Bae E-K, Han K-H, Ko J-H** (2020)  
299 Overexpression of a Poplar RING-H2 Zinc Finger, Ptxerico, Confers Enhanced Drought  
300 Tolerance via Reduced Water Loss and Ion Leakage in Populus. *International Journal of*  
301 *Molecular Sciences* **21**: 9454
- 302 **Kim S, Cheong K, Park J, Kim M-S, Kim J, Seo M-K, Chae GY, Jang MJ, Mang H, Kwon S-H,**  
303 **Kim Y-M, Koo N, Min CW, Kim K-S, Oh N, Kim K-T, Jeon J, Kim H, Lee Y-Y, Sohn**  
304 **KH, McCann HC, Ye S-K, Kim ST, Park K-S, Lee Y-H, Choi D** (2020) TGFam-Finder: a  
305 novel solution for target-gene family annotation in plants. *New Phytologist* **227**: 1568-  
306 1581
- 307 **Kuleshov MV, Jones MR, Rouillard AD, Fernandez NF, Duan Q, Wang Z, Koplev S, Jenkins**  
308 **SL, Jagodnik KM, Lachmann A, McDermott MG, Monteiro CD, Gundersen GW,**  
309 **Ma'ayan A** (2016) Enrichr: a comprehensive gene set enrichment analysis web server  
310 2016 update. *Nucleic Acids Research* **44**: W90-W97
- 311 **Lafarguette F, Lep le J-C, D jardin A, Laurans F, Costa G, Lesage-Descauses M-C, Pilate G**  
312 (2004) Poplar genes encoding fasciclin-like arabinogalactan proteins are highly  
313 expressed in tension wood. *New Phytologist* **164**: 107-121
- 314 **Malhotra S, Sowdhamini R** (2013) Genome-wide survey of DNA-binding proteins in  
315 *Arabidopsis thaliana* : analysis of distribution and functions. *Nucleic Acids Research* **41**:  
316 7212-7219
- 317 **Martin DM, Aubourg S, Schouwey MB, Daviet L, Schalk M, Toub O, Lund ST, Bohlmann J**  
318 (2010) Functional Annotation, Genome Organization and Phylogeny of the Grapevine  
319 (*Vitis vinifera*) Terpene Synthase Gene Family Based on Genome Assembly, FLCDNA  
320 Cloning, and Enzyme Assays. *BMC Plant Biology* **10**: 226
- 321 **Martin L, Decourteix M, Badel E, Huguet S, Moulia B, Julien J-L, Leblanc-Fournier N** (2014)  
322 The zinc finger protein PtaZFP2 negatively controls stem growth and gene expression  
323 responsiveness to external mechanical loads in poplar. *New Phytologist* **203**: 168-181
- 324 **Medina I, Carbonell J, Pulido L, Madeira SC, Goetz S, Conesa A, Tizrraga Jn, Pascual-**  
325 **Montano A, Nogales-Cadenas R, Santoyo J, Garc a F, Marb  M, Montaner D,**  
326 **Dopazo Jn** (2010) Babelomics: an integrative platform for the analysis of  
327 transcriptomics, proteomics and genomic data with advanced functional profiling.  
328 *Nucleic Acids Research* **38**: W210-W213
- 329 **Mitchell A, Chang H-Y, Daugherty L, Fraser M, Hunter S, Lopez R, McAnulla C, McMenamin**

330 C, Nuka G, Pesseat S, Sangrador-Vegas A, Scheremetjew M, Rato C, Yong S-Y,  
331 Bateman A, Punta M, Attwood TK, Sigrist CJA, Redaschi N, Rivoire C, Xenarios I,  
332 Kahn D, Guyot D, Bork P, Letunic I, Gough J, Oates M, Haft D, Huang H, Natale DA,  
333 Wu CH, Orengo C, Sillitoe I, Mi H, Thomas PD, Finn RD (2015) The InterPro protein  
334 families database: the classification resource after 15 years. *Nucleic Acids Research* **43**:  
335 D213-D221

336 **Nogales-Cadenas R, Carmona-Saez P, Vazquez M, Vicente C, Yang X, Tirado F, Carazo JM,**  
337 **Pascual-Montano A** (2009) GeneCodis: interpreting gene lists through enrichment  
338 analysis and integration of diverse biological information. *Nucleic Acids Research* **37**:  
339 W317-W322

340 **Selle A, Willmann M, Grunze N, Geßler A, Weiß M, Nehls U** (2005) The high-affinity poplar  
341 ammonium importer PttAMT1.2 and its role in ectomycorrhizal symbiosis. *New*  
342 *Phytologist* **168**: 697-706

343 **Wei Q, Jiao C, Guo L, Ding Y, Cao J, Feng J, Dong X, Mao L, Sun H, Yu F, Yang G, Shi P, Ren**  
344 **G, Fei Z** (2017) Exploring key cellular processes and candidate genes regulating the  
345 primary thickening growth of Moso underground shoots. *New Phytologist* **214**: 81-96

346 **Xiao G, He P, Zhao P, Liu H, Zhang L, Pang C, Yu J** (2018) Genome-wide identification of the  
347 GhARF gene family reveals that GhARF2 and GhARF18 are involved in cotton fibre cell  
348 initiation. *Journal of Experimental Botany* **69**: 4323-4337

349 **Xing HT, Guo P, Xia XL, Yin WL** (2011) PdERECTA, a leucine-rich repeat receptor-like kinase of  
350 poplar, confers enhanced water use efficiency in Arabidopsis. *Planta* **234**: 229-241

351 **Xu D, Lu Z, Jin K, Qiu W, Qiao G, Han X, Zhuo R** (2021) SPDE: a multi-functional software for  
352 sequence processing and data extraction. *Bioinformatics*

353 **Yu G, Wang L-G, Han Y, He Q-Y** (2012) clusterProfiler: an R Package for Comparing Biological  
354 Themes Among Gene Clusters. *OMICS: A Journal of Integrative Biology* **16**: 284-287

355 **Zhou Y, Zhou B, Pache L, Chang M, Khodabakhshi AH, Tanaseichuk O, Benner C, Chanda SK**  
356 (2019) Metascape provides a biologist-oriented resource for the analysis of systems-  
357 level datasets. *Nature Communications* **10**: 1523

358 **Zhu H-Y, Li C-M, Wang L-F, Bai H, Li Y-P, Yu W-X, Xia D-A, Liu C-C** (2014) In Silico  
359 Identification and Characterization of N-Terminal Acetyltransferase Genes of Poplar  
360 (*Populus trichocarpa*). *International Journal of Molecular Sciences* **15**: 1852-1864

361

362

363

364

365 **Table 1 The annotation information for Bradi2g62150.2.p**

| Gene ID          | KEGG ID | Annotation information                                      |
|------------------|---------|-------------------------------------------------------------|
| Bradi2g62150.2.p | K21063  | 5-amino-6-(5-phospho-D-ribitylamino) uracil phosphatase     |
| Bradi2g62150.2.p | K23736  | 2-lysophosphatidate phosphatase                             |
| Bradi2g62150.2.p | K19270  | mannitol-1-/sugar-/sorbitol-6-phosphatase                   |
| Bradi2g62150.2.p | K03273  | D-glycero-D-manno-heptose 1,7-bisphosphate phosphatase      |
| Bradi2g62150.2.p | K24204  | mannitol-1-/sugar-/sorbitol-6-/2-deoxyglucose-6-phosphatase |

---

|                  |        |                                                  |
|------------------|--------|--------------------------------------------------|
| Bradi2g62150.2.p | K01091 | phosphoglycolate phosphatase                     |
| Bradi2g62150.2.p | K20866 | glucose-1-phosphatase                            |
| Bradi2g62150.2.p | K18551 | pyrimidine and pyridine-specific 5'-nucleotidase |
| Bradi2g62150.2.p | K20881 | 5'-nucleotidase                                  |
| Bradi2g62150.2.p | K06019 | pyrophosphatase PpaX                             |
| Bradi2g62150.2.p | K22292 | N-acetyl-D-muramate 6-phosphate phosphatase      |
| Bradi2g62150.2.p | K07025 | putative hydrolase of the HAD superfamily        |
| Bradi2g62150.2.p | K02101 | arabinose operon protein AraL                    |
| Bradi2g62150.2.p | K01560 | 2-haloacid dehalogenase                          |
| Bradi2g62150.2.p | K20862 | FMN hydrolase                                    |
| Bradi2g62150.2.p | K16017 | AHBA synthesis associated protein                |
| Bradi2g62150.2.p | K01838 | beta-phosphoglucomutase                          |

---

367

368 **Figure legends**

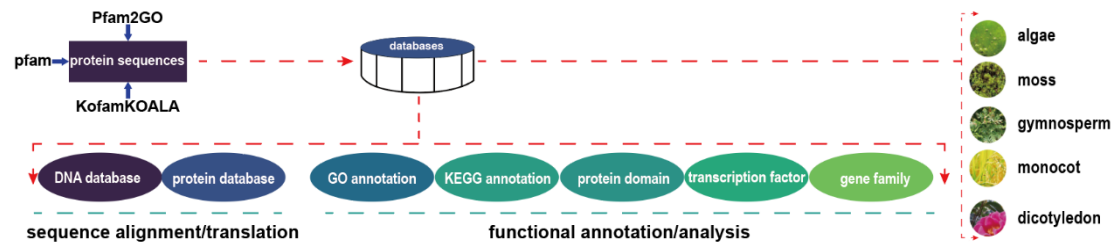

369

370 **Figure 1 The construction of GFAP databases and the contained data**

371 All protein domains in full sequences were detected, and annotated the corresponding  
 372 information. The GFAP databases were thus constructed. These protein sequences were  
 373 gained from five categories of plants, ranging from algae, moss, gymnosperm to  
 374 monocot and dicotyledon. Five kinds of data were contained in the databases. In detail,  
 375 DNA and protein data were utilized for sequence alignment. The data of GO, KEGG  
 376 and protein domain were used for the annotating process.

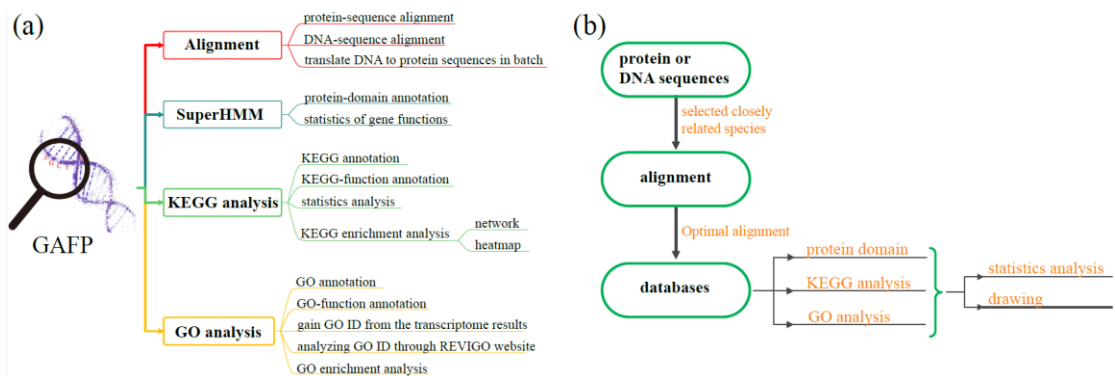

377

378 **Figure 2 Functions and workflow of GFAP**

379 (a) overview of GFAP functions. Total four modules (including sequence alignment,  
 380 protein-domain query, KEGG ID and GO ID) were contained in GFAP. They are  
 381 responsible for the sequence alignment, translation, identification of protein domains,  
 382 KEGG annotation, GO annotation, statistics analysis and drawing. (b) the workflow of  
 383 GFAP. Users can annotate their sequences in just four steps.

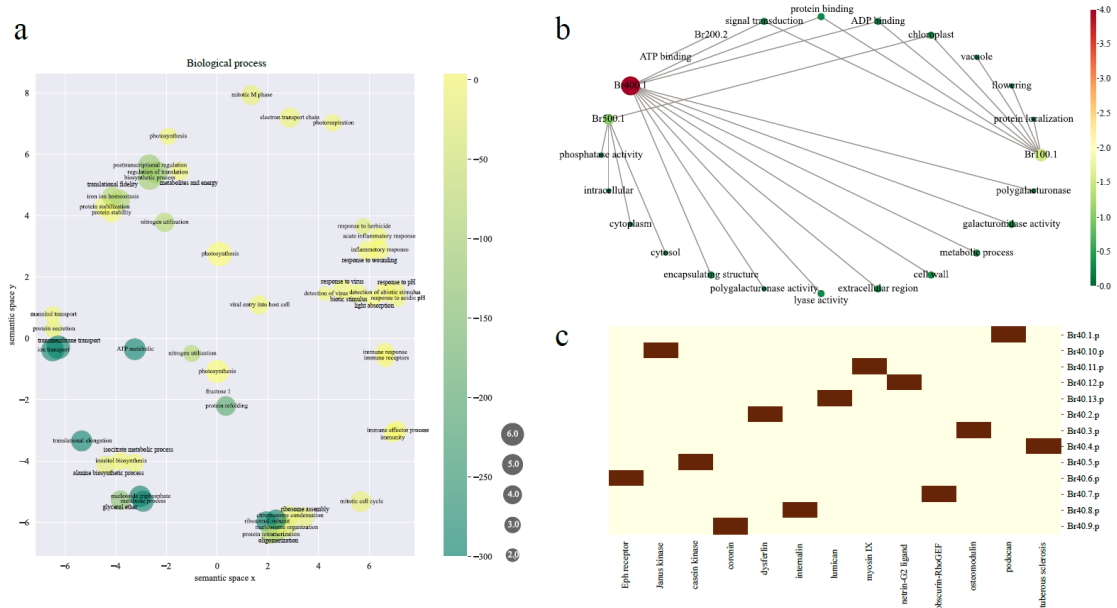

384

385 **Figure 3 Drawing functions and interface features of GFAP**

386 Enrichment analysis of GO can be completed by GFAP, with the help of REVIGO (a).

387 The network and heatmap can also be finished using GFAP (b and c). The prompt

388 information on the interface of GFAP helped users run GFAP accurately (d).

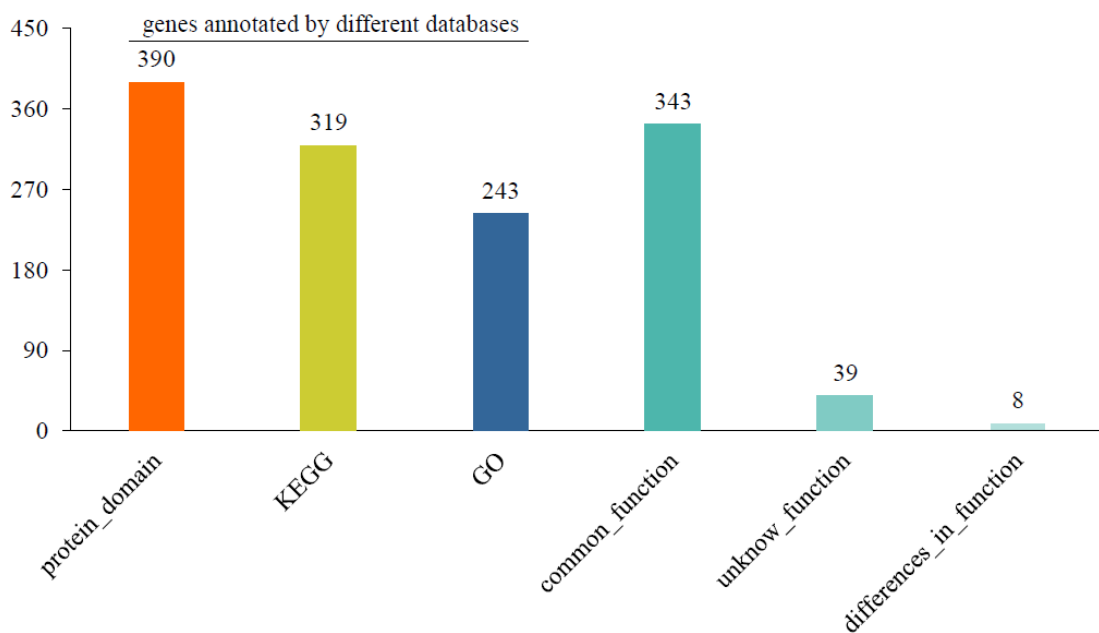

389

390 **Figure 4 The number of annotated genes with different reference species**
